# Supplementary material
Source: PubMed Central journal article supplement (PMC2084279)

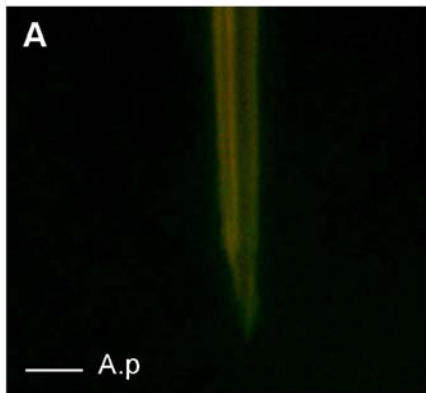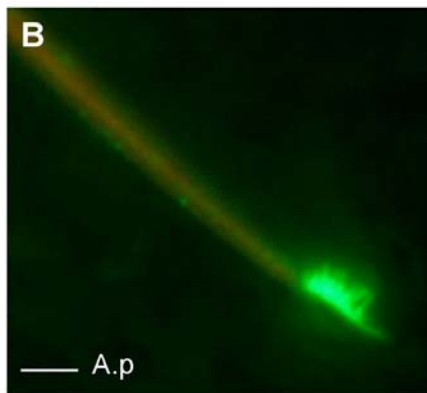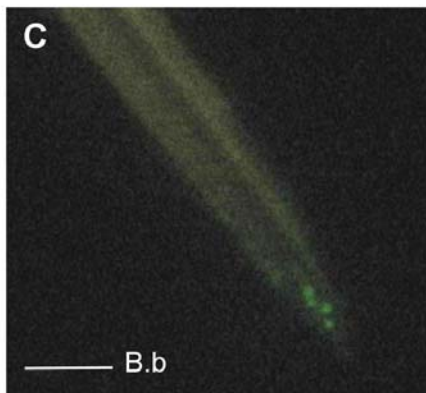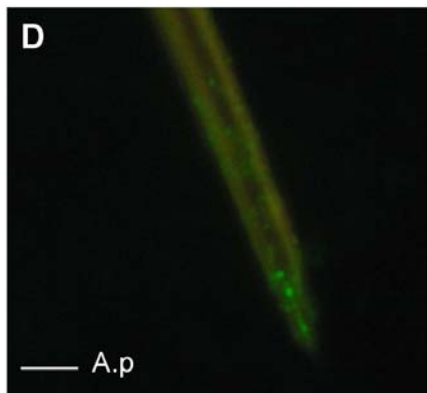

Supplement: pnas_0706608104_1.pdf [file pnas_0706608104_1.pdf]

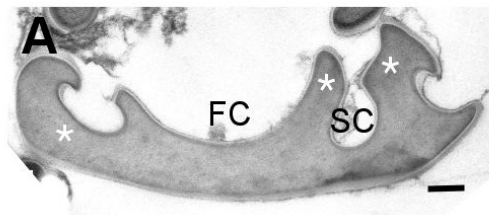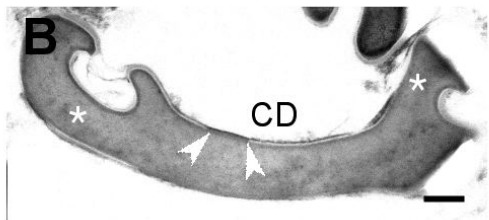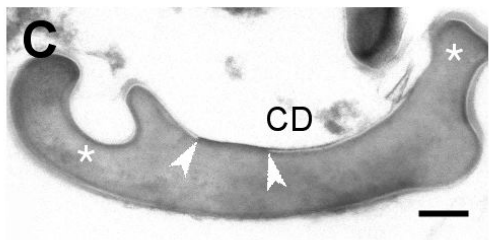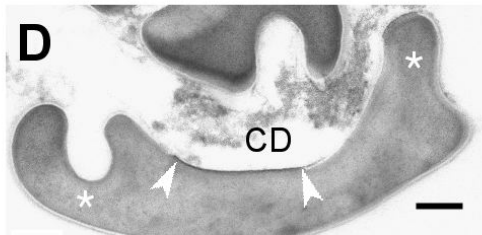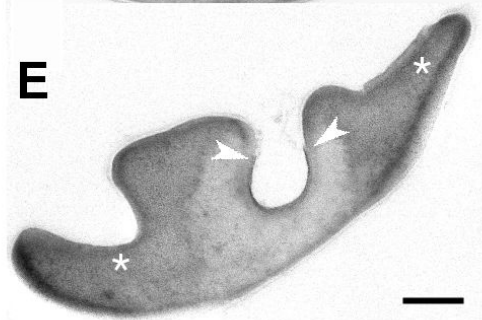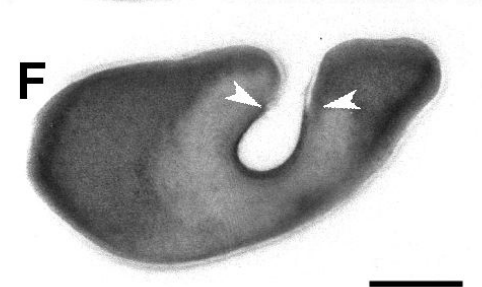

Supplement: pnas_0706608104_2.pdf [file pnas_0706608104_2.pdf]
